# Supplementary material for: Ameliorating electrochemical performance of Li-rich Mn-based cathodes for Li-ion batteries by Fe substitution
Source: Royal Society of Chemistry journal article supplement (doi:10.1039/d3ta06003a), 2023-12-11
Supplement: d3ta06003a1.pdf [file d3ta06003a1.pdf]

## Supplementary Information

### Ameliorating Electrochemical Performance of Li-rich Mn-based Cathode for Li-ion Batteries by Fe Substitution

Won-Chan Kim<sup>a</sup>, Juo Kim<sup>b</sup>, Ji-Hwan Kim<sup>a</sup>, Deok-Hye Park<sup>a</sup>, Yu-Yeon Park<sup>a</sup>,  
Jae-Sung Jang<sup>a</sup>, So-Yeon Ahn<sup>a</sup>, Kyoungmin Min<sup>b,\*</sup>, Kyung-Won Park<sup>a,\*</sup>

<sup>a</sup> Department of Chemical Engineering, Soongsil University, Seoul 06978, Republic of Korea

<sup>b</sup> School of Mechanical Engineering, Soongsil University, Seoul 06978, Republic of Korea

\* Corresponding authors

E-mail address: [kmin.min@ssu.ac.kr](mailto:kmin.min@ssu.ac.kr) (K. Min), [kwpark@ssu.ac.kr](mailto:kwpark@ssu.ac.kr) (K.-W. Park)

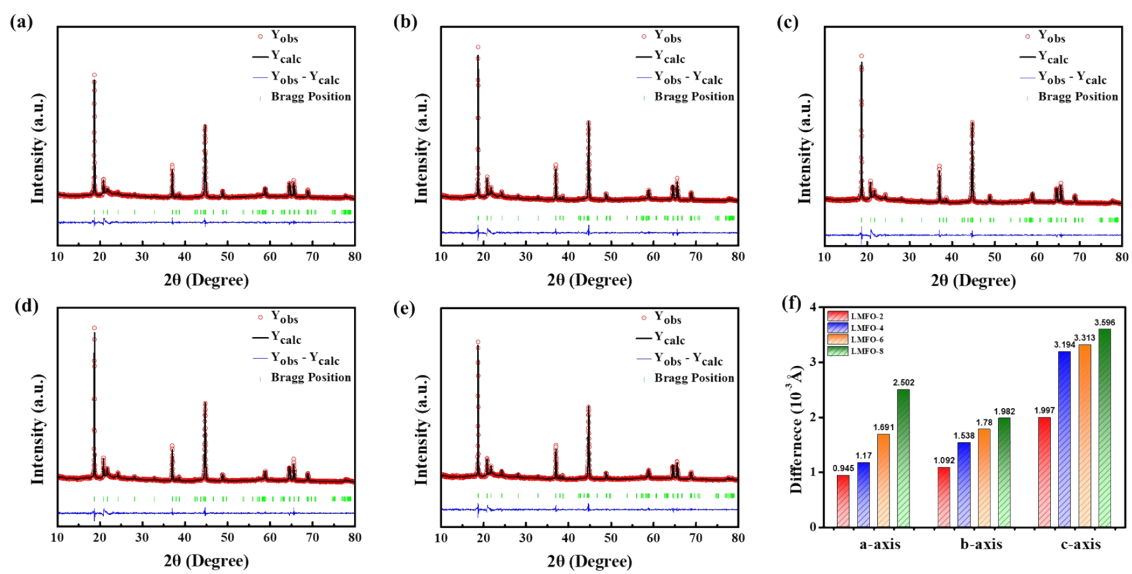

**Fig. S1.** (a)–(e) Rietveld refinement results of the LMFO-X cathodes. (f) Differences in a-, b-, and c-axes calculated via Rietveld refinement of the LMFO-X cathodes.

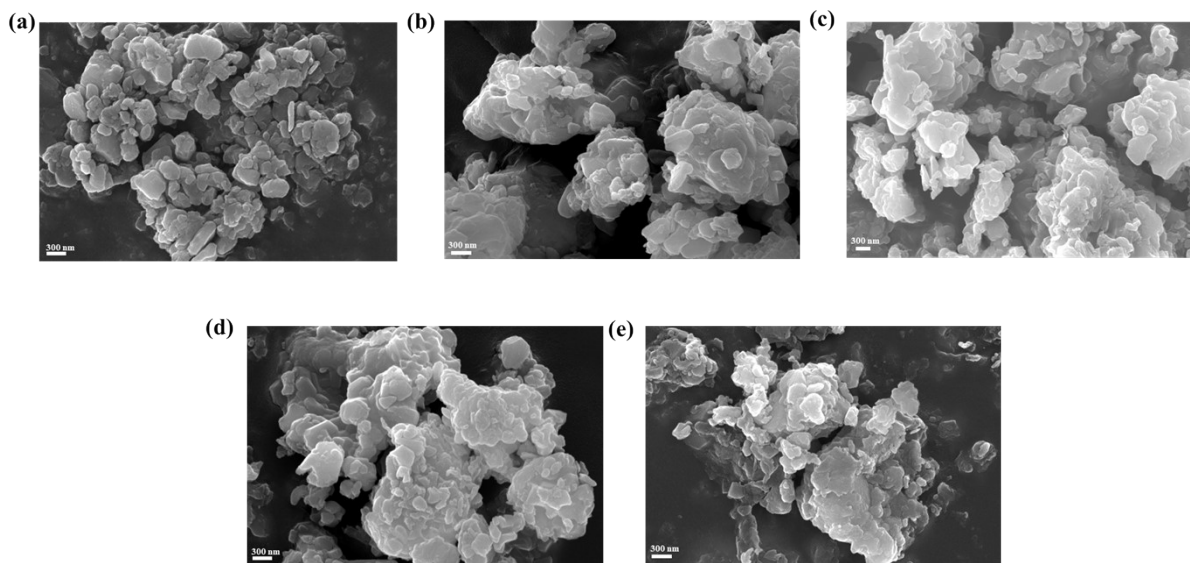

**Fig. S2.** SEM images of (a) LMFO-0, (b) LMFO-2, (c) LMFO-4, (d) LMFO-6, and (e) LMFO-8.

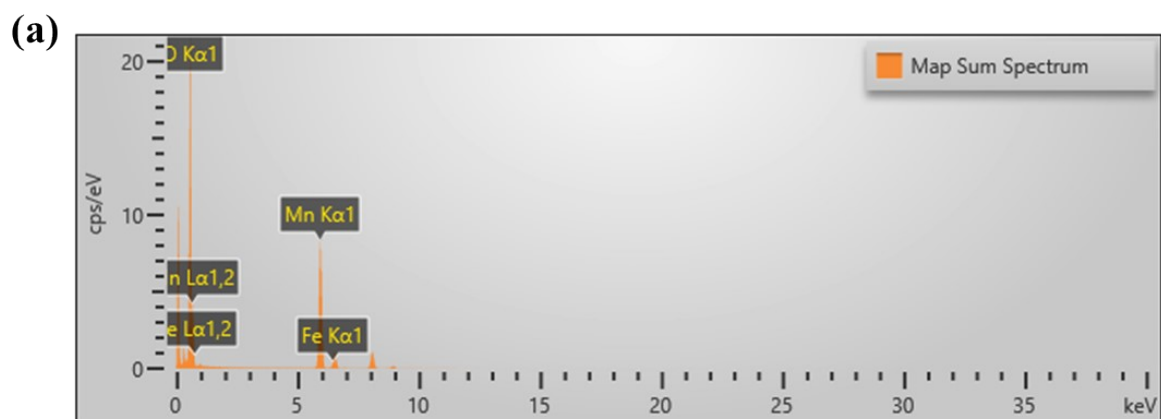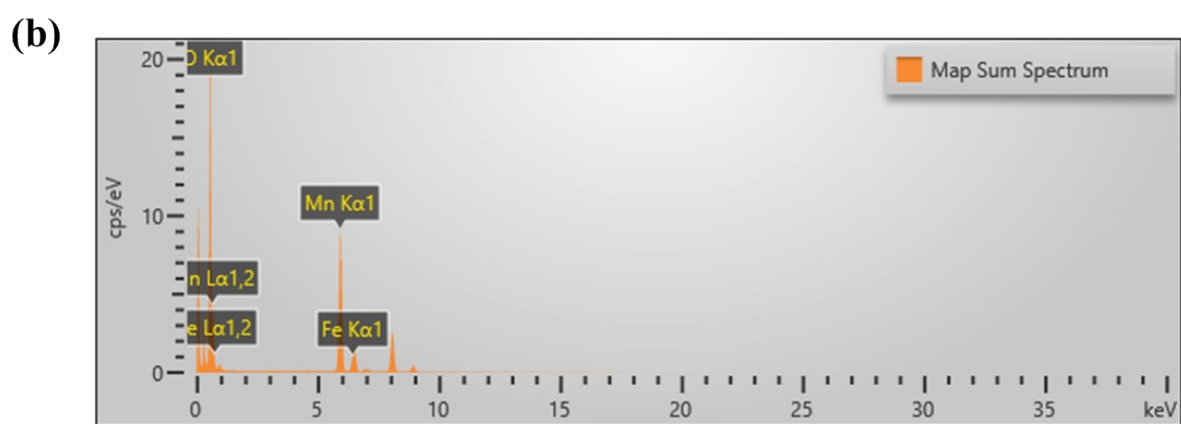

**Fig. S3.** TEM-EDS spectra of (a) LMFO-0 and (b) LMFO-6.

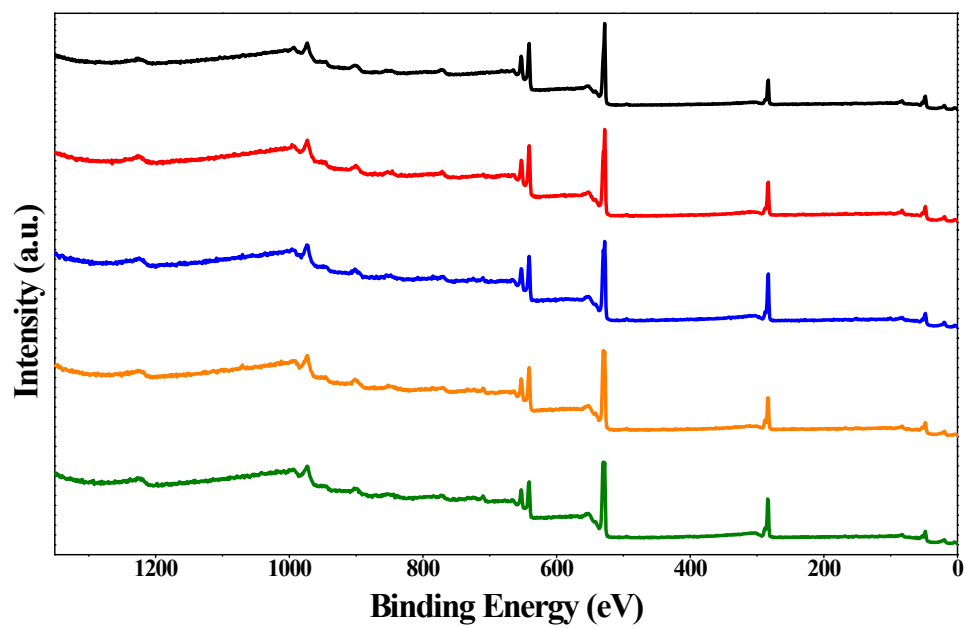

**Fig. S4.** XPS survey spectra of the LMFO-X cathodes.

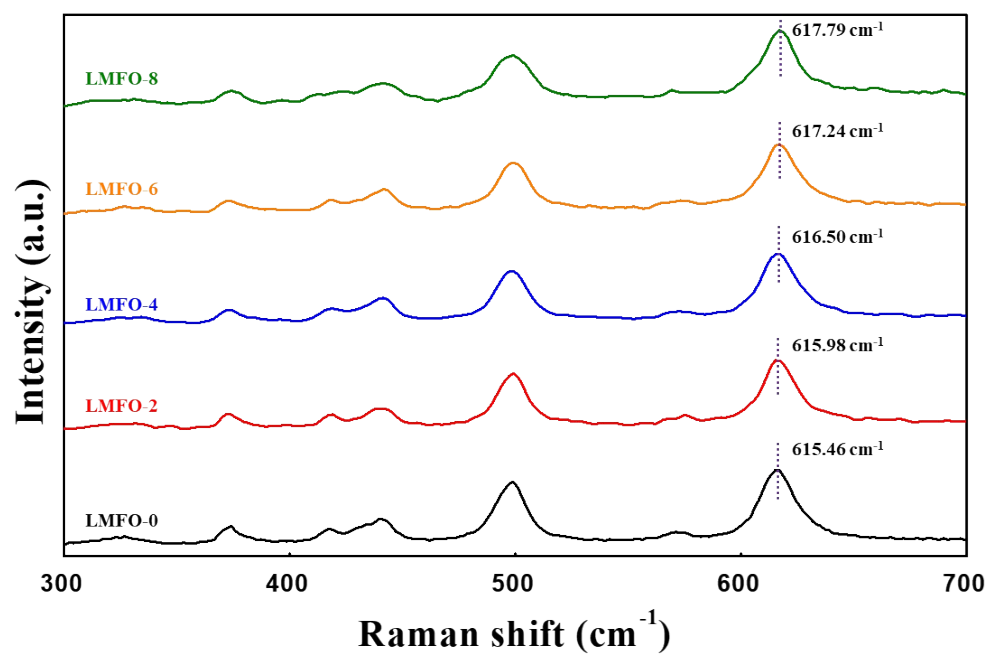

**Fig. S5.** Raman spectra of the LMFO-X (X=0, 2, 4, 6, and 8) samples.

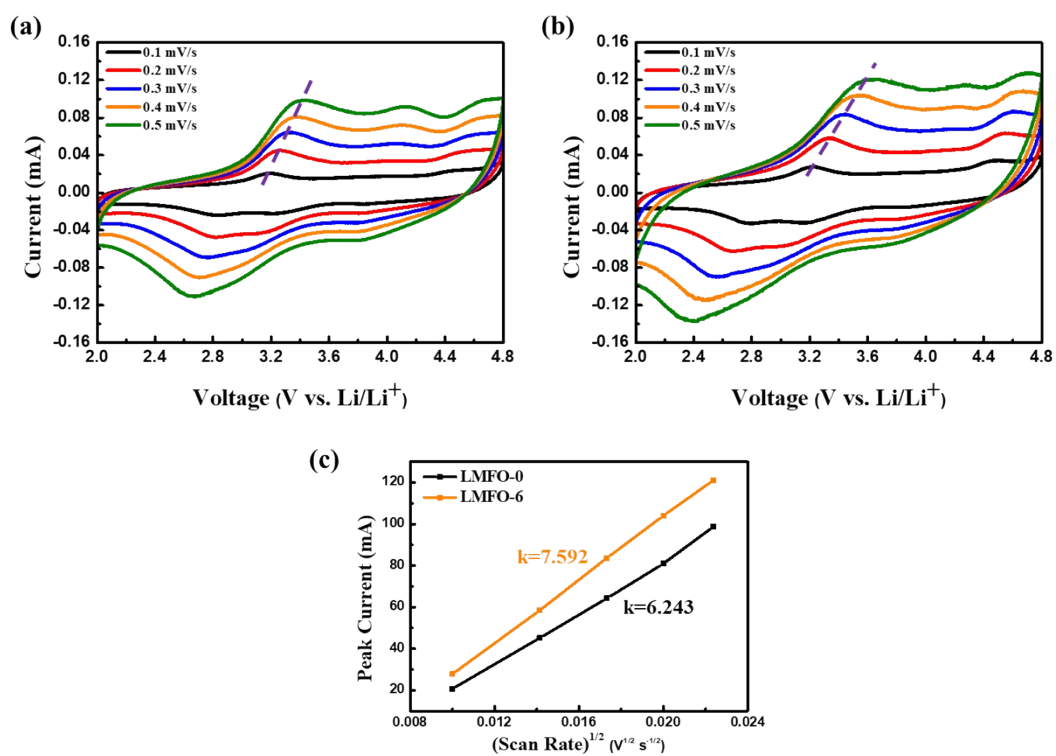

**Fig. S6.** Cyclic Voltammetry results of (a) LMFO-0 and (b) LMFO-6 at different scan rates, (c) The relation of peak current and square root (scan rate) of LMFO-0 and LMFO-6 calculated from the CV data.
